# Supplementary material
Source: PubMed Central journal article supplement (PMC3752654)
Supplement: NIHMS499288-supplement-Appendices.pdf [file NIHMS499288-supplement-Appendices.pdf]

JOURNAL *of* HEALTH  
*and* SOCIAL BEHAVIOR

OFFICIAL JOURNAL OF THE AMERICAN SOCIOLOGICAL  
ASSOCIATION

ONLINE SUPPLEMENT

to article in

Journal of Health and Social Behavior, 2012, Vol. 53, Issue 4

**Adolescent Mental Health, Behavior Problems, and Academic  
Achievement**

Jane D. McLeod  
*Indiana University*

Ryotaro Uemura  
*Keio University*

Shawna Rohrman  
*Indiana University*

DOI: 10.1177/0022146512462888

**APPENDIX A. Descriptive Statistics for Study Variables**

| Variable                              | Mean   | Std. Dev. | N    |
|---------------------------------------|--------|-----------|------|
| <b>Mental Health Problems</b>         |        |           |      |
| Depression (Dp)                       | .11    | .31       | 666  |
| Attention problems (A)                | .20    | .40       | 1288 |
| Delinquency (D)                       | .19    | .39       | 1171 |
| Regular substance use (S)             | .23    | .42       | 1429 |
| Regular cigarette use                 | .14    | .35       | 903  |
| Regular alcohol use                   | .11    | .31       | 680  |
| Regular drug use                      | .08    | .27       | 505  |
| <b>Combinations of Problems</b>       |        |           |      |
| Depression alone (Dp)                 | .04    | .19       | 236  |
| Attention problems alone (A)          | .10    | .30       | 635  |
| Delinquency alone (D)                 | .06    | .24       | 399  |
| Substance use alone (S)               | .09    | .28       | 559  |
| Dp-A                                  | .01    | .11       | 81   |
| Dp-D                                  | .01    | .10       | 61   |
| Dp-S                                  | .01    | .12       | 91   |
| A-D                                   | .02    | .14       | 121  |
| A-S                                   | .03    | .17       | 183  |
| D-S                                   | .05    | .21       | 291  |
| Dp-A-D                                | .01    | .07       | 33   |
| Dp-A-S                                | .01    | .08       | 42   |
| Dp-D-S                                | .01    | .11       | 72   |
| A-D-S                                 | .02    | .15       | 143  |
| Dp-A-D-S                              | .01    | .09       | 48   |
| <b>Academic Achievement</b>           |        |           |      |
| High school GPA                       | 2.55   | .91       |      |
| Highest degree                        | 4.72   | 1.66      |      |
| <b>Academic Aptitude</b>              |        |           |      |
| Vocabulary test score                 | 101.39 | 14.20     |      |
| Special education/learning disability | .13    | .33       |      |
| <b>Controls</b>                       |        |           |      |
| Male (reference)                      | .46    | .50       |      |
| Female                                | .54    | .50       |      |
| White (reference)                     | .54    | .50       |      |
| Asian                                 | .07    | .26       |      |
| Black                                 | .19    | .40       |      |
| Hispanic                              | .17    | .38       |      |
| Native American                       | .01    | .09       |      |
| Other race                            | .01    | .09       |      |

|                                               |       |       |
|-----------------------------------------------|-------|-------|
| Age                                           | 16.07 | 1.13  |
| 9 <sup>th</sup> grade (reference)             | .29   | .46   |
| 10 <sup>th</sup> grade                        | .32   | .47   |
| 11 <sup>th</sup> grade                        | .32   | .47   |
| 12 <sup>th</sup> grade                        | .07   | .25   |
| Parent less than high school (reference)      | .13   | .33   |
| Parent high school                            | .24   | .43   |
| Parent some college                           | .28   | .45   |
| Parent college or more                        | .34   | .47   |
| Family income in thousands                    | 47.75 | 55.55 |
| Did not receive public assistance (reference) | .87   | .33   |
| Received public assistance                    | .13   | .33   |
| Two-parent biological family (reference)      | .56   | .50   |
| Two-parent stepfamily                         | .12   | .33   |
| Single parent family                          | .25   | .43   |
| Other family arrangement                      | .07   | .25   |

---

Note: Descriptive statistics are from the combined imputed data sets. Parent's education is based on parent's report and, when not available, youth report. Public assistance receipt includes AFDC, food stamps, and housing assistance.

**APPENDIX B. Coefficients and Effect Comparisons from Regression of Highest Degree on Combinations of Problems**

|                              | b                 | Comparison of multiple vs. single problems: |                    |             |               |
|------------------------------|-------------------|---------------------------------------------|--------------------|-------------|---------------|
|                              |                   | Depression                                  | Attention problems | Delinquency | Substance use |
| Depression alone (Dp)        | -.08<br>(.17)     |                                             |                    |             |               |
| Attention problems alone (A) | -.21<br>(.13)     |                                             |                    |             |               |
| Delinquency alone (D)        | -.47**<br>(.15)   |                                             |                    |             |               |
| Substance use alone (S)      | -.83***<br>(.12)  |                                             |                    |             |               |
| Dp-A                         | -.71**<br>(.24)   | *                                           | ns                 |             |               |
| Dp-D                         | -.56<br>(.34)     | ns                                          |                    | ns          |               |
| Dp-S                         | -.80**<br>(.24)   | *                                           |                    |             | ns            |
| A-D                          | -.70**<br>(.25)   |                                             | ns                 | ns          |               |
| A-S                          | -1.23***<br>(.16) |                                             | ***                |             | *             |
| D-S                          | -1.35***<br>(.16) |                                             |                    | ***         | **            |
| Dp-A-D                       | -.91<br>(.59)     | ns                                          | ns                 | ns          |               |
| Dp-A-S                       | -1.65***<br>(.35) | ***                                         | ***                |             | *             |
| Dp-D-S                       | -1.03***<br>(.28) | **                                          |                    | ns          | ns            |
| A-D-S                        | -1.48***<br>(.25) |                                             | ***                | ***         | *             |
| Dp-A-D-S                     | -1.38***<br>(.27) | ***                                         | ***                | **          | ns            |

*Notes:* Coefficients from ordinal logistic regression. Standard errors are in parentheses. Model included controls for academic aptitude and social background. N = 6,315. \*p < .05; \*\*p < .01; \*\*\*p < .001; ns = not significant.
